# Supplementary material
Source: publisher figshare collection journal article supplement (https://frontiersin.figshare.com/ndownloader/files/28152909)
Supplement: Supplementary file 1 [file 28152909]

# Supplementary Figures


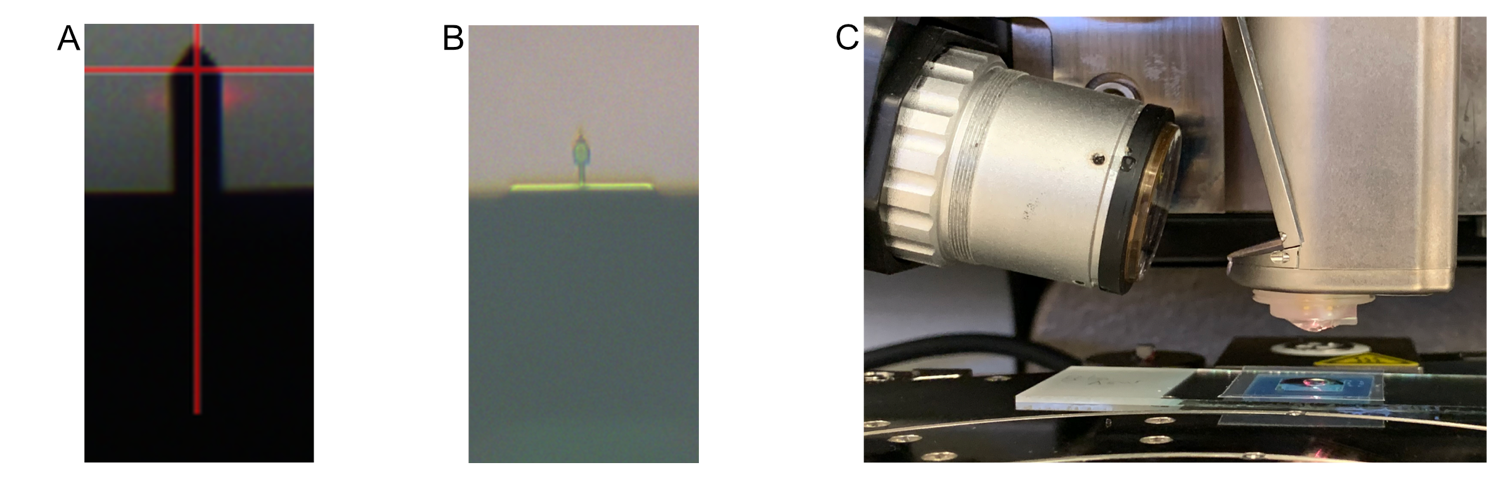

**Supplementary Figure 1**: Photographs of probes (A) RTESPA-300-30 used for in air measurement and (B) PFQNM-LC-A-CAL used for in liquid measurement performed into a PDMS seal “container” to limit the liquid droplet. (C).


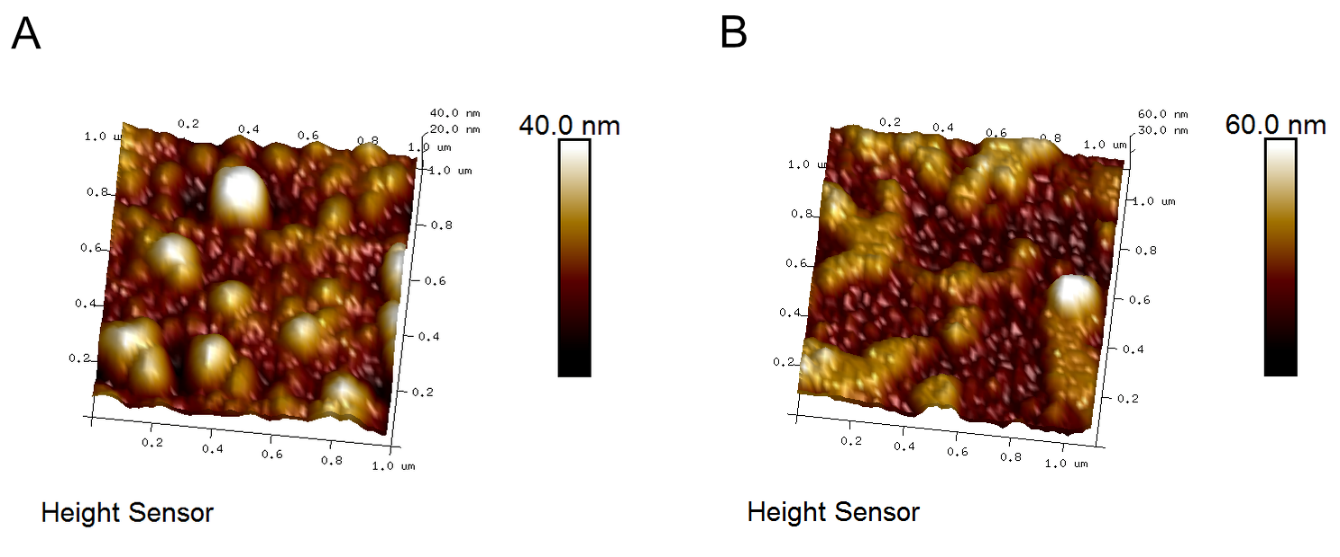


**Supplementary Figure 2:** 3D Map of height sensor of rSfp1 Beta C-term in ASW. (A) In air. (B) In deionized water.
